# Supplementary material
Source: HighWire-hosted journal article supplement (https://www.cmajopen.ca/highwire/filestream/80862/field_highwire_adjunct_files/1/open-2014-0071-reporting-checklist.pdf)
Supplement: open-2014-0071-reporting-checklist.pdf [file open-2014-0071-reporting-checklist.pdf]

COREQ Checklist – CMAJ Open Submission – Wright, Fishman, Karsoho, Sandham, & Macdonald

|                                                |                                                                       |                                                                                                                                                                                                                                                                                                                                                                                                             |
|------------------------------------------------|-----------------------------------------------------------------------|-------------------------------------------------------------------------------------------------------------------------------------------------------------------------------------------------------------------------------------------------------------------------------------------------------------------------------------------------------------------------------------------------------------|
| <b>Domain 1: Research team and reflexivity</b> |                                                                       |                                                                                                                                                                                                                                                                                                                                                                                                             |
| Personal characteristics                       |                                                                       |                                                                                                                                                                                                                                                                                                                                                                                                             |
| Interviewer/facilitator                        | Which author/s conducted the interview or focus group?                | Not applicable. There were no interviews or focus groups in this study.                                                                                                                                                                                                                                                                                                                                     |
| Credentials                                    | What were the researcher's credentials?                               | DW: PhD<br>JF: PhD<br>HK: BSc<br>SS: MA<br>MEM: PhD                                                                                                                                                                                                                                                                                                                                                         |
| Occupation                                     | What was their occupation at the time of the study?                   | DW: Postdoctoral fellow<br>JF: Assistant professor<br>HK: Doctoral student<br>SS: Research assistant<br>MEM: Assistant professor                                                                                                                                                                                                                                                                            |
| Gender                                         | Was the researcher male or female?                                    | DW: Male<br>JF: Female<br>HK: Male<br>SS: Female<br>MEM: Female                                                                                                                                                                                                                                                                                                                                             |
| Experience and training                        | What experience or training did the researcher have?                  | JF and MEM are qualitative researchers and teach qualitative research at a University level. MEM is the director of the McGill Qualitative Health Research Group. DW and SS have completed graduate degrees using qualitative methods. DW has supervised clinical research projects using qualitative methods. JF and MEM supervised the analysis and oversaw the doctoral student and postdoctoral fellow. |
| Relationship with participants                 |                                                                       |                                                                                                                                                                                                                                                                                                                                                                                                             |
| Relationship established                       | Was a relationship established prior to study commencement?           | Not applicable. There are no participants in this study.                                                                                                                                                                                                                                                                                                                                                    |
| Participant knowledge of the interviewer       | What did the participants know about the researcher?                  | Not applicable. There are no participants in this study.                                                                                                                                                                                                                                                                                                                                                    |
| Interviewer characteristics                    | What characteristics were reported about the interviewer/facilitator? | Not applicable. There was no interviewer or facilitator in this study.                                                                                                                                                                                                                                                                                                                                      |
| <b>Domain 2: study design</b>                  |                                                                       |                                                                                                                                                                                                                                                                                                                                                                                                             |
| Theoretical framework                          |                                                                       |                                                                                                                                                                                                                                                                                                                                                                                                             |
| Methodological orientation and theory          | What methodological orientation was stated to                         | Discourse analysis                                                                                                                                                                                                                                                                                                                                                                                          |

COREQ Checklist – CMAJ Open Submission – Wright, Fishman, Karsoho, Sandham, & Macdonald

|                              |                                                                               |                                                                                                                                                                                                                                                                       |
|------------------------------|-------------------------------------------------------------------------------|-----------------------------------------------------------------------------------------------------------------------------------------------------------------------------------------------------------------------------------------------------------------------|
|                              | underpin the study?                                                           |                                                                                                                                                                                                                                                                       |
| Participant selection        |                                                                               |                                                                                                                                                                                                                                                                       |
| Sampling                     | How were participants selected?                                               | Not applicable. There are no participants in this study.<br><br>(Our sample of articles however, were selected based on an exhaustive search of relevant databases followed by screening for relevance according to specific criteria as specified in the manuscript) |
| Method of approach           | How were participants approached?                                             | Not applicable. There are no participants in this study.                                                                                                                                                                                                              |
| Sample size                  | How many participants were in the study?                                      | Not applicable. There are no participants in this study.<br><br>(Our sample of articles for analysis is n=285)                                                                                                                                                        |
| Non-participation            | How many people refused to participate or dropped out? Reasons?               | Not applicable. There are no participants in this study.                                                                                                                                                                                                              |
| Setting of data collection   | Where was the data collected?                                                 | Texts were collected electronically.                                                                                                                                                                                                                                  |
| Presence of non-participants | Was anyone else present besides the participants and researchers?             | Not applicable. There are no participants in this study.                                                                                                                                                                                                              |
| Description of sample        | What are the important characteristics of the sample?                         | The sample of articles includes news articles, letters to the editor, opinion pieces, and editorials, about euthanasia. They are either authored by a physician or reference a physician perspective.                                                                 |
| Data collection              |                                                                               |                                                                                                                                                                                                                                                                       |
| Interview guide              | Were questions, prompts, guides provided by the authors? Was it pilot tested? | Not applicable. There were no interviews in this study.                                                                                                                                                                                                               |
| Repeat interviews            | Were repeat interviews carried out? If yes, how many?                         | Not applicable. There were no interviews in this study.                                                                                                                                                                                                               |
| Audio/visual recording       | Did the research use audio or visual recording to collect the data?           | Not applicable. There were no interviews in this study.                                                                                                                                                                                                               |
| Field notes                  | Were field notes made during and/or after the interview or focus group?       | Not applicable. There were no interviews in this study.                                                                                                                                                                                                               |
| Duration                     | What was the duration of the                                                  | Not applicable. There were no                                                                                                                                                                                                                                         |

COREQ Checklist – CMAJ Open Submission – Wright, Fishman, Karsoho, Sandham, & Macdonald

|                                        |                                                                                                                                |                                                                                                                                                                                                                                                                                                                                                                                                                                                                                                                                                   |
|----------------------------------------|--------------------------------------------------------------------------------------------------------------------------------|---------------------------------------------------------------------------------------------------------------------------------------------------------------------------------------------------------------------------------------------------------------------------------------------------------------------------------------------------------------------------------------------------------------------------------------------------------------------------------------------------------------------------------------------------|
|                                        | interviews or focus groups?                                                                                                    | interviews in this study.                                                                                                                                                                                                                                                                                                                                                                                                                                                                                                                         |
| Data saturation                        | Was data saturation discussed?                                                                                                 | Not applicable. Data analysis did not inform data collection. Rather, the sample of articles was determined, and then analyzed.                                                                                                                                                                                                                                                                                                                                                                                                                   |
| Transcripts returned                   | Were transcripts returned to participants for comment and/or correction?                                                       | Not applicable. There were no interviews in this study.                                                                                                                                                                                                                                                                                                                                                                                                                                                                                           |
| <b>Domain 3: analysis and findings</b> |                                                                                                                                |                                                                                                                                                                                                                                                                                                                                                                                                                                                                                                                                                   |
| Data analysis                          |                                                                                                                                |                                                                                                                                                                                                                                                                                                                                                                                                                                                                                                                                                   |
| Number of data coders                  | How many data coders coded the data                                                                                            | 3                                                                                                                                                                                                                                                                                                                                                                                                                                                                                                                                                 |
| Description of the coding tree         | Did authors provide a description of the coding tree?                                                                          | Coding occurred in three phases. First, the data was coded descriptively by one author. Then the data was coded analytically by a second author. This second level of coding generated preliminary themes. At this stage all authors met to review the coding and analysis, articles were reread, and a final interpretation was created. Lastly, data was read by two authors using the themes presented in this article as a deductive framework, in order to ensure that nothing significant was omitted from the analysis and interpretation. |
| Derivation of themes                   | Were themes identified in advance or derived from the data?                                                                    | Derived from the data                                                                                                                                                                                                                                                                                                                                                                                                                                                                                                                             |
| Software                               | What software, if applicable, was used to manage the data?                                                                     | Atlas TI                                                                                                                                                                                                                                                                                                                                                                                                                                                                                                                                          |
| Participant checking                   | Did participants provide feedback on the findings?                                                                             | Not applicable. There are no participants in this study.                                                                                                                                                                                                                                                                                                                                                                                                                                                                                          |
| Reporting                              |                                                                                                                                |                                                                                                                                                                                                                                                                                                                                                                                                                                                                                                                                                   |
| Quotations presented                   | Were participant quotations to illustrate the themes / findings?<br>Was each quotation identified?<br>E.g., participant number | Yes.                                                                                                                                                                                                                                                                                                                                                                                                                                                                                                                                              |
| Data and findings consistent           | Was there consistency between the data presented and the findings?                                                             | Yes.                                                                                                                                                                                                                                                                                                                                                                                                                                                                                                                                              |
| Clarity of major themes                | Were major themes clearly                                                                                                      | Yes.                                                                                                                                                                                                                                                                                                                                                                                                                                                                                                                                              |

COREQ Checklist – CMAJ Open Submission – Wright, Fishman, Karsoho, Sandham, & Macdonald

|                         | presented in the findings?                                             |                                                                                                                                             |
|-------------------------|------------------------------------------------------------------------|---------------------------------------------------------------------------------------------------------------------------------------------|
| Clarity of minor themes | Is there a description of diverse cases or discussion of minor themes? | Yes. For example, minority voices from within the sample of palliative physician perspectives that are explicitly supportive of euthanasia. |
